# Supplementary material for: miR-5089-5p suppresses castration-resistant prostate cancer resistance to enzalutamide and metastasis via miR-5089-5p/SPINK1/ MAPK/MMP9 signaling
Source: publisher site journal article supplement (doi:10.18632/aging.103485), 2020-07-21
Supplement: Supplementary file 1 [file aging-v12i14-103485-supplementary-material-SD1.pdf]

SUPPLEMENTARY FIGURES

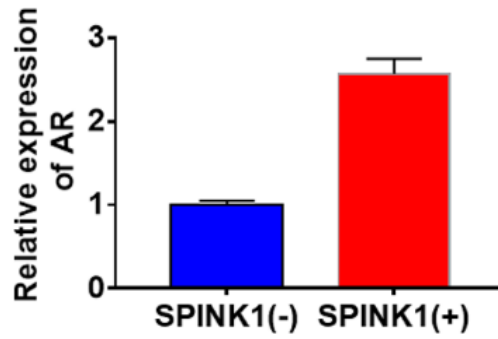

Supplementary Figure 1. qRT-PCR for AR expression in human Pca tissues.

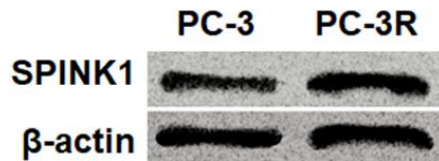

Supplementary Figure 2. Western blot showing high SPINK1 protein levels in C4-2R.

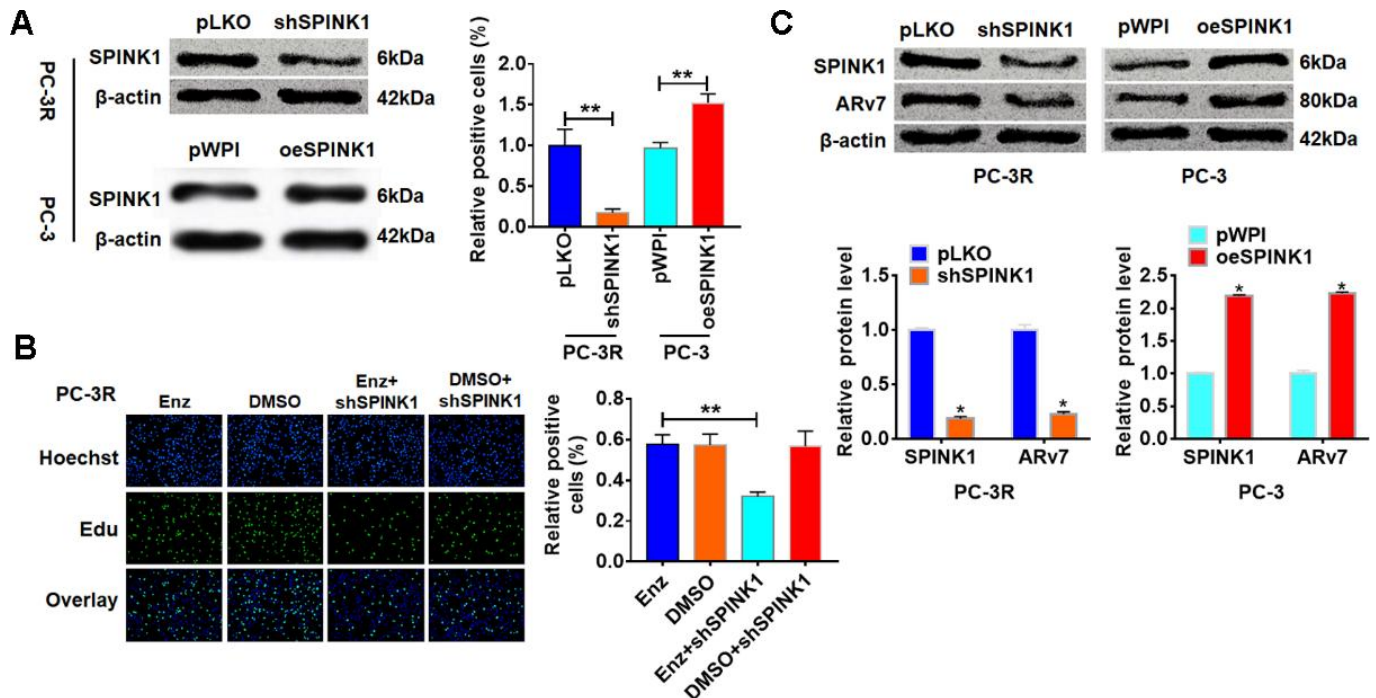

Supplementary Figure 3. SPINK1 promotes Enz resistance and production of ARv7. (A) Western blots and RT-PCR results validating SPINK1 knockdown in PC-3R cells, overexpression in PC-3 cells. (B) Edu incorporation rate in +/-shSPINK1 PC-3R cells with/without Enz treatment. (C) Western blots results showing AR-v7 protein in oeSPINK1 PC-3 cells, and shSPINK1 PC-3R cells. P < 0.05; \*\*P < 0.01.

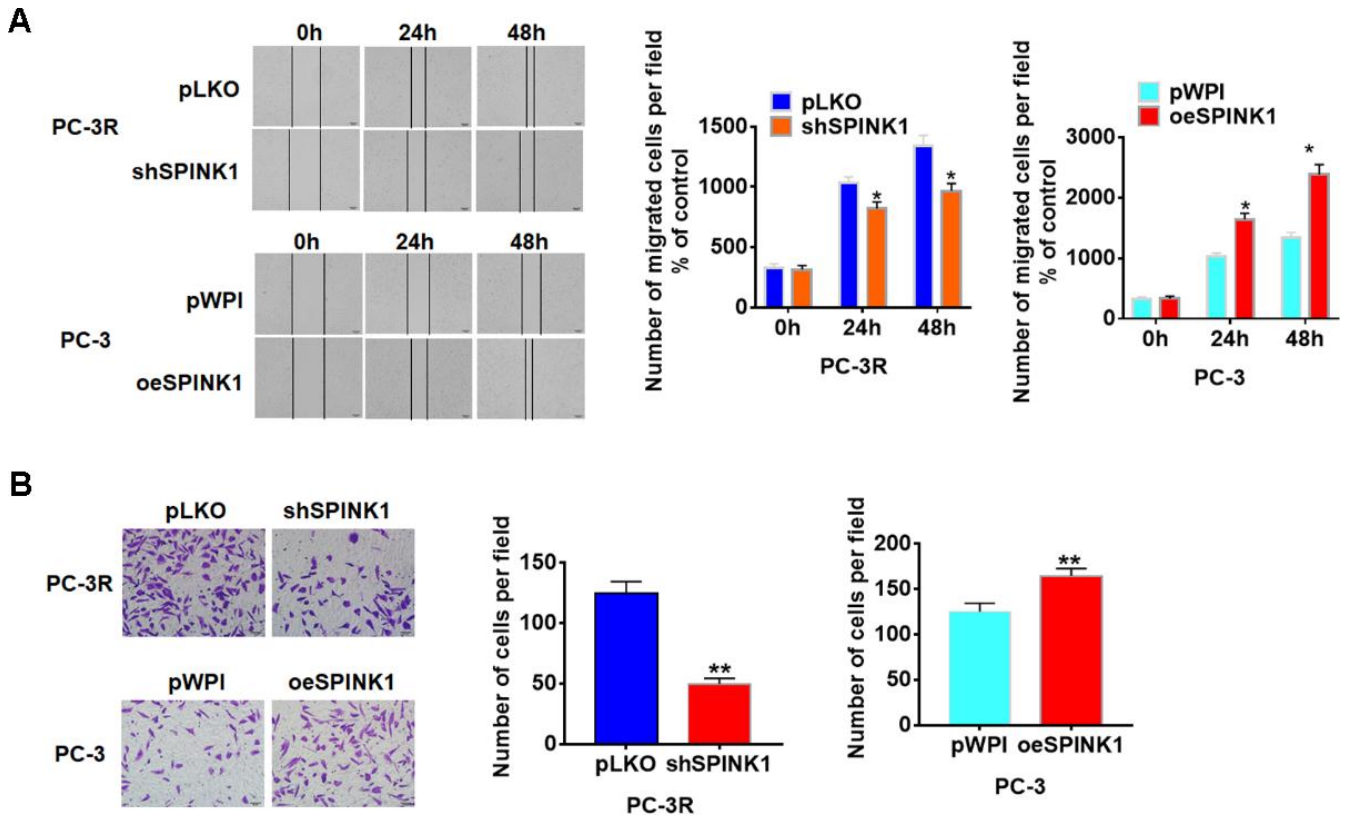

**Supplementary Figure 4. SPINK1 enhances migration and invasion.** (A) Migration rates of shSPINK1 PC-3R cells, and oeSPINK1 PC-3 cells in the wound healing assay. (B) Invasive capacity of shSPINK1 PC-3R cells, and oeSPINK1 PC-3 cells in the transwell assay. \*P < 0.05; \*\*P < 0.01.

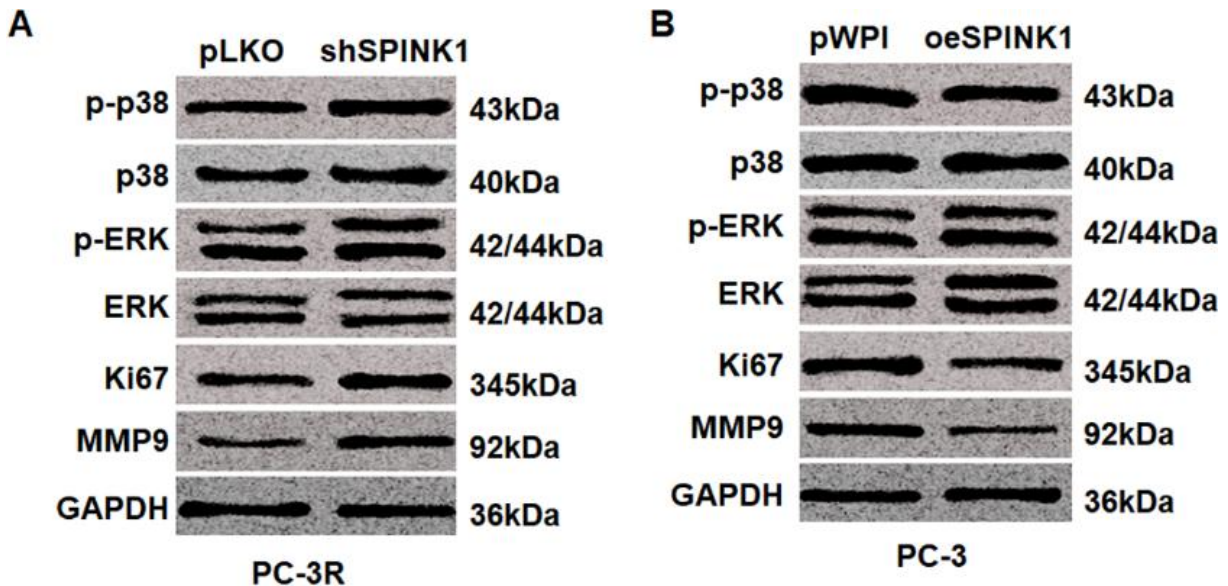

**Supplementary Figure 5. SPINK1 enhances MAPK/MMP9 signaling.** p-ERK, p-p38, Ki67 and MMP9 protein levels in shSPINK1 PC-3R cells, and oeSPINK1 PC-3 cells.
